# Supplementary material
Source: PubMed Central journal article supplement (PMC8315308)

## Supplementary Figure 1

**NM\_052813.4(CARD9):c.865C>T**

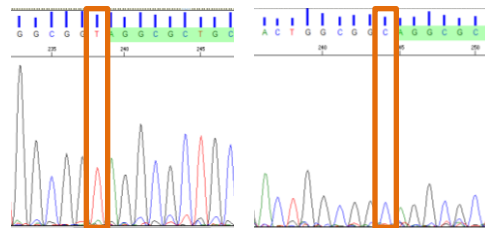

**Patient  
Q289\*/Q289\***

**Healthy control  
WT/WT**

Supplement: NIHMS1629460-supplement-1629460_Sup1.pdf [file NIHMS1629460-supplement-1629460_Sup1.pdf]
